# Supplementary material for: Validating a 14-Drug Microtiter Plate Containing Bedaquiline and Delamanid for Large-Scale Research Susceptibility Testing of Mycobacterium tuberculosis
Source: PubMed Central journal article supplement (PMC6125532; doi:10.1128/aac.00344-18), 2018-08-27
Supplement: zac009187425s1.pdf [file zac009187425s1.pdf]

# Supplemental Material

## **SENSITITRE CUSTOM PLATE FORMAT**

2203161639

Plate Code: **UKMYC5**

Date: **6-Apr-16**

|          | 1     | 2    | 3    | 4     | 5    | 6    | 7     | 8    | 9    | 10   | 11   | 12   |                                                          |
|----------|-------|------|------|-------|------|------|-------|------|------|------|------|------|----------------------------------------------------------|
| <b>A</b> | BDQ   | KAN  | KAN  | KAN   | KAN  | KAN  | ETH   | ETH  | ETH  | ETH  | ETH  | ETH  | <b>ANTIMICROBICS</b><br>BDQ Bedaquiline<br>DLM Delamanid |
|          | 2     | 16   | 8    | 4     | 2    | 1    | 8     | 4    | 2    | 1    | 0.5  | 0.25 |                                                          |
| <b>B</b> | BDQ   | AMI  | EMB  | INH   | LEVO | MXF  | DLM   | LZD  | CFZ  | RIF  | RFB  | PAS  | AMI Amikacin<br>CFZ Clofazimine                          |
|          | 1     | 8    | 8    | 1.6   | 8    | 4    | 1     | 2    | 4    | 4    | 2    | 4    |                                                          |
| <b>C</b> | BDQ   | AMI  | EMB  | INH   | LEVO | MXF  | DLM   | LZD  | CFZ  | RIF  | RFB  | PAS  | EMB Ethambutol<br>ETH Ethionamide                        |
|          | 0.5   | 4    | 4    | 0.8   | 4    | 2    | 0.5   | 1    | 2    | 2    | 1    | 2    |                                                          |
| <b>D</b> | BDQ   | AMI  | EMB  | INH   | LEVO | MXF  | DLM   | LZD  | CFZ  | RIF  | RFB  | PAS  | INH Isoniazid<br>KAN Kanamycin                           |
|          | 0.25  | 2    | 2    | 0.4   | 2    | 1    | 0.25  | 0.5  | 1    | 1    | 0.5  | 1    |                                                          |
| <b>E</b> | BDQ   | AMI  | EMB  | INH   | LEVO | MXF  | DLM   | LZD  | CFZ  | RIF  | RFB  | PAS  | LEVO Levofloxacin<br>LZD Linezolid                       |
|          | 0.12  | 1    | 1    | 0.2   | 1    | 0.5  | 0.12  | 0.25 | 0.5  | 0.5  | 0.25 | 0.5  |                                                          |
| <b>F</b> | BDQ   | AMI  | EMB  | INH   | LEVO | MXF  | DLM   | LZD  | CFZ  | RIF  | RFB  | PAS  | MXF Moxifloxacin<br>PAS Para-aminosalicylic acid         |
|          | 0.06  | 0.5  | 0.5  | 0.1   | 0.5  | 0.25 | 0.06  | 0.12 | 0.25 | 0.25 | 0.12 | 0.25 |                                                          |
| <b>G</b> | BDQ   | AMI  | EMB  | INH   | LEVO | MXF  | DLM   | LZD  | CFZ  | RIF  | RFB  | PAS  | POS Positive Control<br>RFB Rifabutin                    |
|          | 0.03  | 0.25 | 0.25 | 0.05  | 0.25 | 0.12 | 0.03  | 0.06 | 0.12 | 0.12 | 0.06 | 0.12 |                                                          |
| <b>H</b> | BDQ   | EMB  | EMB  | INH   | LEVO | MXF  | DLM   | LZD  | CFZ  | RIF  | POS  | POS  | RIF Rifampin                                             |
|          | 0.015 | 0.06 | 0.12 | 0.025 | 0.12 | 0.06 | 0.015 | 0.03 | 0.06 | 0.06 |      |      |                                                          |

**Figure S1.** The layout of the UKMYC5 microtitre plate. Note that the two wells marked POS in the bottom right contain no antibiotic and are therefore positive controls. Growth must be observed in both wells for a plate to be read.

**Table S1.** The concentration ranges of the 14 drugs present on the UKMYC5 plate. As shown in Figure S1, these all form doubling dilutions.

| <b>Drug name</b>         | <b>Drug abbreviation</b> | <b>Number of wells</b> | <b>Testing Range (mg/L)</b> |
|--------------------------|--------------------------|------------------------|-----------------------------|
| Rifampicin               | RIF                      | 7                      | 0.06 - 4                    |
| Rifabutin                | RFB                      | 6                      | 0.06 - 2                    |
| Ethambutol               | EMB                      | 8                      | 0.06 - 8                    |
| Isoniazid                | INH                      | 7                      | 0.02 – 1.6                  |
| Kanamycin                | KAN                      | 5                      | 1 - 16                      |
| Amikacin                 | AMI                      | 6                      | 0.25 - 8                    |
| Levofloxacin             | LEV                      | 7                      | 0.125 - 8                   |
| Moxifloxacin             | MXF                      | 7                      | 0.06 - 4                    |
| Clofazimine              | CFZ                      | 7                      | 0.06 - 4                    |
| Linezolid                | LZD                      | 7                      | 0.03 - 2                    |
| Para-aminosalicylic acid | PAS                      | 6                      | 0.125 - 4                   |
| Ethionamide              | ETH                      | 6                      | 0.25 - 8                    |
| Bedaquiline              | BDQ                      | 8                      | 0.015 - 2                   |
| Delamanid                | DLM                      | 7                      | 0.015 - 1                   |

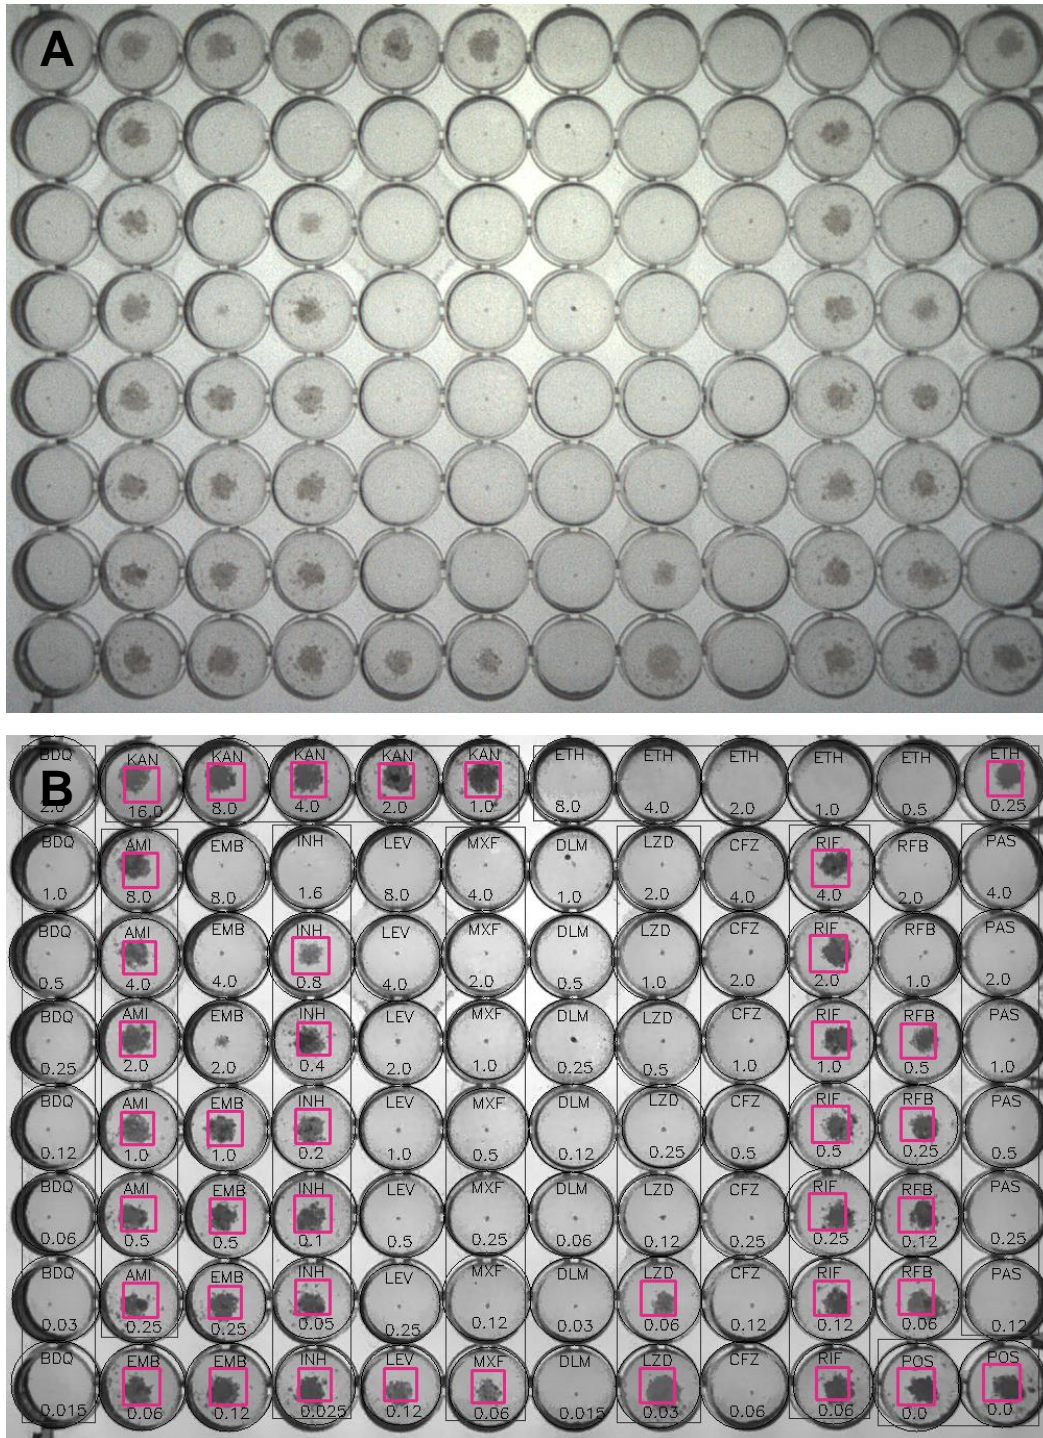

**Figure S2.** An image of a UKMYC5 plate processed by the AMyGDA software. **(A)** the raw bitmap image recorded by the Vizion™ Digital Viewing system. **(B)** The AMyGDA software filters the image to improve the contrast and homogenise the illumination before identifying the location of all 96-wells, annotated and drug and concentration and finally measuring the amount of growth in each well. Wells which the software determines contain growth are marked with a pink square. This image was taken 14 days after inoculation.

**Table S2.** Related to Figure 2. For each reading method, **(A)** the percentage of readable results, **(B)** the inter-reader agreement, **(C)** the agreement between duplicated strains and the **(D)** intra- **(E)** inter-laboratory reproducibility. All values include both off- and on-scale measurements. Site F excluded.

**(A) Percentage (%) of readable results**

| <b>Reading Method</b> | <b>Day 7</b> | <b>Day 10</b> | <b>Day 14</b> | <b>Day 21</b> |
|-----------------------|--------------|---------------|---------------|---------------|
| Vizion                | 60.2         | 79.6          | 93.0          | 97.6          |
| Mirrored-box          | 57.8         | 75.6          | 85.7          | 95.9          |
| Microscope            | 66.1         | 77.8          | 87.4          | 96.0          |

**(B) Inter-reader agreement (%)**

| <b>Reading Method</b> | <b>Day 7</b> | <b>Day 10</b> | <b>Day 14</b> | <b>Day 21</b> |
|-----------------------|--------------|---------------|---------------|---------------|
| Vizion                | 95.5         | 96.5          | 97.9          | 98.0          |
| Mirrored-box          | 96.6         | 96.2          | 97.8          | 98.2          |
| Microscope            | 92.7         | 93.5          | 96.5          | 96.8          |

**(C) Agreement between duplicated strains (%)**

| <b>Reading Method</b> | <b>Day 7</b> | <b>Day 10</b> | <b>Day 14</b> | <b>Day 21</b> |
|-----------------------|--------------|---------------|---------------|---------------|
| Vizion                | 89.7         | 90.6          | 92.8          | 92.9          |
| Mirrored-box          | 91.9         | 91.1          | 92.9          | 92.5          |
| Microscope            | 89.1         | 89.7          | 91.2          | 90.7          |

**(D) Intra-laboratory reproducibility (%)**

| <b>Reading Method</b> | <b>Day 7</b> | <b>Day 10</b> | <b>Day 14</b> | <b>Day 21</b> |
|-----------------------|--------------|---------------|---------------|---------------|
| Vizion                | 90.2         | 94.4          | 95.6          | 92.2          |
| Mirrored-box          | 91.9         | 94.8          | 95.9          | 92.2          |
| Microscope            | 91.1         | 92.9          | 92.9          | 88.1          |

**(E) Inter-laboratory reproducibility (%)**

| <b>Reading Method</b> | <b>Day 7</b> | <b>Day 10</b> | <b>Day 14</b> | <b>Day 21</b> |
|-----------------------|--------------|---------------|---------------|---------------|
| Vizion                | 89.9         | 92.8          | 93.1          | 89.4          |
| Mirrored-box          | 92.0         | 92.8          | 92.7          | 89.2          |
| Microscope            | 90.9         | 91.0          | 89.9          | 85.4          |

**Table S3.** For each reading method, the (A) the agreement between duplicated strains and the (B) intra- (C) inter-laboratory reproducibility. These analyses include for each drug, only the data of the strains with the MIC mode on-scale. Site F excluded.

**(A) Inter-reader agreement (%)**

| <b>Reading Method</b> | <b>Day 7</b> | <b>Day 10</b> | <b>Day 14</b> | <b>Day 21</b> |
|-----------------------|--------------|---------------|---------------|---------------|
| Vizion                | 95.7         | 97.4          | 98.5          | 98.7          |
| Mirrored-box          | 96.8         | 97.0          | 98.7          | 99.0          |
| Microscope            | 93.0         | 95.2          | 97.7          | 97.9          |

**(B) Intra-laboratory reproducibility (%)**

| <b>Reading Method</b> | <b>Day 7</b> | <b>Day 10</b> | <b>Day 14</b> | <b>Day 21</b> |
|-----------------------|--------------|---------------|---------------|---------------|
| Vizion                | 89.1         | 94.6          | 96.5          | 94.6          |
| Mirrored-box          | 91.3         | 94.8          | 96.9          | 94.6          |
| Microscope            | 91.7         | 94.5          | 95.1          | 90.7          |

**(C) Inter-laboratory reproducibility (%)**

| <b>Reading Method</b> | <b>Day 7</b> | <b>Day 10</b> | <b>Day 14</b> | <b>Day 21</b> |
|-----------------------|--------------|---------------|---------------|---------------|
| Vizion                | 87.3         | 92.6          | 94.9          | 93.7          |
| Mirrored-box          | 89.9         | 92.9          | 94.7          | 93.6          |
| Microscope            | 90.8         | 92.8          | 93.1          | 90.4          |

**Table S4.** Related to Figure 2. The percentage of measurements that were off-scale for each drug, by reading method and reading day. The drugs with the smallest proportion of off-scale MICs measured using the UKMYC5 plate were EMB, LEV, LZD and MXF. Site F excluded.

|            | VIZION |       |       |       | MIRROR |       |       |       | MICROSCOPE |       |       |       |
|------------|--------|-------|-------|-------|--------|-------|-------|-------|------------|-------|-------|-------|
|            | day7   | day10 | day14 | day21 | day7   | day10 | day14 | day21 | day7       | day10 | day14 | day21 |
| <b>AMK</b> | 87.2   | 78.5  | 68.1  | 53.9  | 83.5   | 74.7  | 66.2  | 53.9  | 66.1       | 63.8  | 59.2  | 48.6  |
| <b>BDQ</b> | 52.6   | 40.6  | 26.1  | 11.8  | 47.3   | 35.9  | 23.2  | 11.1  | 40.9       | 31.3  | 21.1  | 10.8  |
| <b>CFZ</b> | 66.2   | 66.1  | 61.6  | 48.0  | 67.7   | 62.6  | 59.2  | 45.5  | 56.4       | 54.8  | 50.7  | 39.0  |
| <b>DLM</b> | 91.4   | 86.7  | 79.9  | 57.4  | 86.9   | 84.1  | 77.3  | 55.6  | 83.9       | 81.4  | 71.9  | 50.1  |
| <b>EMB</b> | 6.1    | 5.1   | 5.0   | 8.0   | 4.1    | 4.2   | 4.2   | 7.4   | 5.0        | 4.4   | 5.6   | 8.9   |
| <b>ETH</b> | 12.6   | 10.4  | 10.4  | 11.8  | 10.6   | 9.4   | 10.7  | 11.9  | 11.8       | 10.2  | 11.3  | 13.1  |
| <b>INH</b> | 51.8   | 45.4  | 40.4  | 38.6  | 46.9   | 41.4  | 36.9  | 37.9  | 44.1       | 40.6  | 34.2  | 38.6  |
| <b>KAN</b> | 74.5   | 56.9  | 46.5  | 40.3  | 74.2   | 53.7  | 45.4  | 41.2  | 51.9       | 45.1  | 40.0  | 36.7  |
| <b>LEV</b> | 10.8   | 8.7   | 6.1   | 6.6   | 7.3    | 6.5   | 6.0   | 6.9   | 8.4        | 6.8   | 6.8   | 7.3   |
| <b>LZD</b> | 3.5    | 1.7   | 0.7   | 0.5   | 1.4    | 1.2   | 0.9   | 0.8   | 0.6        | 1.2   | 0.9   | 0.4   |
| <b>MXF</b> | 15.5   | 10.0  | 8.1   | 7.4   | 11.7   | 7.5   | 7.6   | 7.2   | 10.0       | 7.2   | 8.4   | 7.8   |
| <b>PAS</b> | 82.5   | 66.4  | 43.2  | 30.0  | 83.1   | 60.5  | 43.5  | 30.1  | 57.8       | 44.4  | 32.9  | 25.6  |
| <b>RFB</b> | 77.4   | 80.6  | 80.5  | 81.4  | 79.0   | 79.1  | 81.1  | 82.4  | 75.4       | 79.8  | 81.9  | 83.2  |
| <b>RIF</b> | 83.9   | 77.5  | 72.2  | 57.6  | 80.4   | 74.7  | 69.9  | 56.3  | 72.6       | 71.4  | 63.0  | 49.0  |

**Table S5.** Logistic mixed-effects models for readable results, inter-reader agreement and agreement between duplicated strains (excluding Site F, adjusted for drug, interaction between reading day and drug). Random effects were defined nested with respect to strains, sites and replicates.

| Parameter            | Readable results |       |         | Inter-reader agreement |       |         | Agreement between duplicated strains |       |         |
|----------------------|------------------|-------|---------|------------------------|-------|---------|--------------------------------------|-------|---------|
|                      | Estimate         | SE    | p-value | Estimate               | SE    | p-value | Estimate                             | SE    | p-value |
| Intercept            | 4.939            | 0.336 | <0.001  | 4.926                  | 0.297 | <0.001  | 3.805                                | 0.296 | <0.001  |
| READINGDAY           |                  |       |         |                        |       |         |                                      |       |         |
| Day 7 vs 14          | -3.846           | 0.119 | <0.001  | -1.246                 | 0.335 | <0.001  | -1.482                               | 0.324 | <0.001  |
| Day 10 vs 14         | -1.993           | 0.119 | <0.001  | -0.609                 | 0.337 | 0.071   | -0.633                               | 0.326 | 0.052   |
| Day 21 vs 14         | 1.816            | 0.187 | <0.001  | -0.103                 | 0.355 | 0.772   | -0.414                               | 0.313 | 0.185   |
| METHOD               |                  |       |         |                        |       |         |                                      |       |         |
| MIRROR vs VIZION     | -1.236           | 0.059 | <0.001  | -0.154                 | 0.157 | 0.327   | -0.031                               | 0.123 | 0.803   |
| MICROSCOPE vs VIZION | -1.007           | 0.060 | <0.001  | -0.692                 | 0.141 | <0.001  | -0.300                               | 0.116 | 0.010   |
| Day 7: MIRROR        |                  |       |         |                        |       |         |                                      |       |         |
| Day 10: MIRROR       | 0.988            | 0.073 | <0.001  | 0.501                  | 0.215 | 0.020   | 0.247                                | 0.183 | 0.178   |
| Day 21: MIRROR       | 0.835            | 0.073 | <0.001  | 0.111                  | 0.206 | 0.590   | 0.152                                | 0.169 | 0.368   |
| Day 7: MICROSCOPE    |                  |       |         |                        |       |         |                                      |       |         |
| Day 10: MICROSCOPE   | 0.489            | 0.111 | <0.001  | 0.245                  | 0.220 | 0.267   | -0.035                               | 0.169 | 0.834   |
| Day 21: MICROSCOPE   | 1.567            | 0.073 | <0.001  | 0.380                  | 0.186 | 0.042   | 0.459                                | 0.168 | 0.006   |
| Day 10: MICROSCOPE   |                  |       |         |                        |       |         |                                      |       |         |
| Day 21: MICROSCOPE   | 0.820            | 0.074 | <0.001  | -0.0002                | 0.185 | 0.999   | 0.262                                | 0.161 | 0.104   |
| Day 21: MICROSCOPE   |                  |       |         |                        |       |         |                                      |       |         |
| Day 7: MICROSCOPE    | 0.277            | 0.112 | 0.0130  | 0.108                  | 0.197 | 0.582   | -0.026                               | 0.161 | 0.873   |

**Table S6.** Logistic mixed-effects models for intra- and inter-laboratory reproducibility (excluding Site F, adjusted for drug, interaction between reading day and drug). Random effects were defined nested with respect to strains, sites and replicates.

| Parameter            | Intra-laboratory reproducibility |       |         | Inter-laboratory reproducibility |       |         |
|----------------------|----------------------------------|-------|---------|----------------------------------|-------|---------|
|                      | Estimate                         | SE    | p-value | Estimate                         | SE    | p-value |
| Intercept            | 3.918                            | 0.156 | <0.001  | 3.541                            | 0.145 | <0.001  |
| READINGDAY           |                                  |       |         |                                  |       |         |
| Day 7 vs 14          | -1.059                           | 0.183 | <0.001  | -0.904                           | 0.171 | <0.001  |
| Day 10 vs 14         | -0.319                           | 0.191 | 0.096   | -0.143                           | 0.180 | 0.426   |
| Day 21 vs 14         | -1.001                           | 0.162 | <0.001  | -0.954                           | 0.147 | <0.001  |
| METHOD               |                                  |       |         |                                  |       |         |
| MIRROR vs VIZION     | 0.051                            | 0.077 | 0.505   | -0.079                           | 0.062 | 0.199   |
| MICROSCOPE vs VIZION | -0.615                           | 0.068 | <0.001  | -0.488                           | 0.058 | <0.001  |
| Day 7: MIRROR        | 0.190                            | 0.102 | 0.063   | 0.344                            | 0.090 | <0.001  |
| Day 10: MIRROR       | 0.049                            | 0.106 | 0.641   | 0.075                            | 0.089 | 0.399   |
| Day 21: MIRROR       | -0.068                           | 0.096 | 0.475   | 0.043                            | 0.080 | 0.593   |
| Day 7: MICROSCOPE    | 0.828                            | 0.094 | <0.001  | 0.655                            | 0.085 | <0.001  |
| Day 10: MICROSCOPE   | 0.354                            | 0.096 | <0.001  | 0.224                            | 0.084 | 0.008   |
| Day 21: MICROSCOPE   | 0.027                            | 0.087 | 0.752   | 0.007                            | 0.076 | 0.928   |



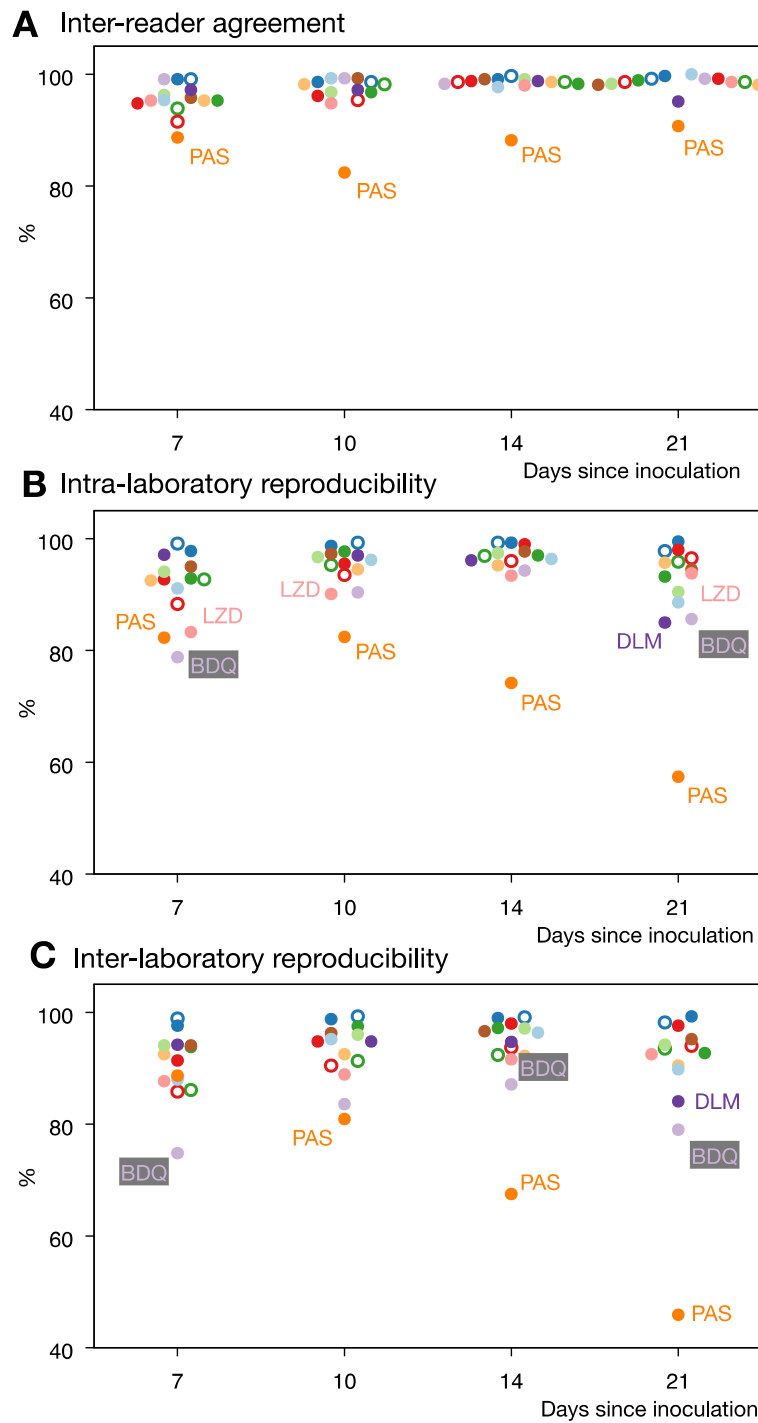

**Figure S3.** Related to Figure 3. The **(A)** inter-reader agreement and **(B)** intra- and **(C)** inter-laboratory reproducibility for each drug across all reading days (only Vizion measurements, excluding Site F). PAS shows the lowest agreement between readers at each reading day. The drugs are labelled using the abbreviations defined in Table S1 and coloured according to the scheme in Figure 3.

**Table S7.** Related to Figure 3. The inter-reader agreement and intra- and inter-laboratory reproducibilities for each drug (only Vizion, excluding Site F). PAS is either the lowest value, or is in the lowest values of all three metrics, across all reading days.

| Drug | Inter-reader agreement (%) |       |       |       | Intra-laboratory reproducibility (%) |       |       |       | Inter-laboratory reproducibility (%) |       |       |       |
|------|----------------------------|-------|-------|-------|--------------------------------------|-------|-------|-------|--------------------------------------|-------|-------|-------|
|      | Day 7                      | Day10 | Day14 | Day21 | Day7                                 | Day10 | Day14 | Day21 | Day7                                 | Day10 | Day14 | Day21 |
| AMK  | 99.1                       | 98.6  | 99.1  | 99.7  | 97.8                                 | 98.7  | 99.3  | 99.5  | 97.6                                 | 98.8  | 99.0  | 99.3  |
| BDQ  | 99.1                       | 99.3  | 98.3  | 99.2  | 78.8                                 | 90.4  | 94.3  | 85.6  | 74.8                                 | 83.6  | 87.1  | 79.0  |
| CFZ  | 95.3                       | 98.2  | 98.6  | 98.1  | 92.5                                 | 94.5  | 95.2  | 95.7  | 92.5                                 | 92.5  | 92.2  | 90.5  |
| DLM  | 97.2                       | 97.2  | 98.8  | 95.1  | 97.1                                 | 97.0  | 96.1  | 85.0  | 94.2                                 | 94.8  | 94.7  | 84.1  |
| EMB  | 95.4                       | 99.3  | 97.7  | 100.0 | 91.1                                 | 96.2  | 96.4  | 88.6  | 88.0                                 | 95.2  | 96.4  | 89.8  |
| ETH  | 96.3                       | 96.8  | 99.1  | 98.3  | 94.1                                 | 96.7  | 97.4  | 90.5  | 94.1                                 | 96.0  | 97.1  | 94.2  |
| INH  | 95.8                       | 99.3  | 99.1  | 98.1  | 95.0                                 | 97.3  | 97.7  | 94.5  | 94.1                                 | 96.3  | 96.6  | 95.2  |
| KAN  | 99.1                       | 98.6  | 99.7  | 99.2  | 99.1                                 | 99.3  | 99.3  | 97.8  | 98.9                                 | 99.3  | 99.1  | 98.2  |
| LEV  | 94.8                       | 96.1  | 98.8  | 99.2  | 92.7                                 | 95.5  | 99.0  | 98.0  | 91.4                                 | 94.8  | 98.0  | 97.6  |
| LZD  | 95.3                       | 94.8  | 98.0  | 98.6  | 83.3                                 | 90.1  | 93.4  | 93.8  | 87.7                                 | 88.9  | 91.6  | 92.5  |
| MOX  | 91.5                       | 95.4  | 98.6  | 98.6  | 88.3                                 | 93.5  | 96.0  | 96.5  | 85.8                                 | 90.5  | 93.7  | 94.0  |
| PAS  | 88.7                       | 82.4  | 88.2  | 90.7  | 82.3                                 | 82.4  | 74.2  | 57.4  | 88.7                                 | 80.9  | 67.5  | 45.9  |
| RFB  | 93.9                       | 98.2  | 98.6  | 98.6  | 92.7                                 | 95.3  | 96.9  | 95.9  | 86.1                                 | 91.3  | 92.4  | 93.5  |
| RIF  | 95.3                       | 96.8  | 98.3  | 98.9  | 92.9                                 | 97.7  | 97.0  | 93.2  | 93.8                                 | 97.5  | 97.2  | 92.7  |

**Table S8.** The inter-reader agreement, intra- and inter-laboratory reproducibilities for each drug (only Vizion, excluding Site F) calculated only for (drug, strain) combinations where the mode MIC was 'on-scale' i.e. was neither the first nor last well.

| Drug | n. strains with mode on-scale | Inter-reader agreement (%) |       |       |       | Intra-laboratory reproducibility (%) |       |       |       | Inter-laboratory reproducibility (%) |       |       |       |
|------|-------------------------------|----------------------------|-------|-------|-------|--------------------------------------|-------|-------|-------|--------------------------------------|-------|-------|-------|
|      |                               | Day 7                      | Day10 | Day14 | Day21 | Day7                                 | Day10 | Day14 | Day21 | Day7                                 | Day10 | Day14 | Day21 |
| AMK  | 4                             | 100                        | 99.1  | 100   | 100   | 100                                  | 99.6  | 100   | 98.9  | 100                                  | 100   | 100   | 100   |
| BDQ  | 8                             | 99.2                       | 100   | 97.9  | 99.5  | 68.9                                 | 87    | 94.6  | 91.2  | 59.6                                 | 77    | 89.8  | 94.6  |
| CFZ  | 3                             | 94.7                       | 95.3  | 98.1  | 96.5  | 83.8                                 | 85    | 86.9  | 90.6  | 82.5                                 | 83.9  | 83.2  | 83.8  |
| DLM  | 1                             | 83.3                       | 78.6  | 93.3  | 88.9  | 84                                   | 89.7  | 96.8  | 91.7  | 40                                   | 51.7  | 71    | 86.1  |
| EMB  | 18                            | 95                         | 99.3  | 97.9  | 100   | 90.5                                 | 96    | 96.4  | 88    | 87.9                                 | 94.9  | 96.7  | 89.5  |
| ETH  | 17                            | 96.2                       | 97.6  | 99    | 98.2  | 95                                   | 97.6  | 97.3  | 89.5  | 95.2                                 | 96.8  | 97    | 93.6  |
| INH  | 10                            | 96.1                       | 99.4  | 99    | 96.8  | 96.2                                 | 98.3  | 97.6  | 92.9  | 95.5                                 | 97.5  | 96.7  | 93.6  |
| KAN  | 8                             | 100                        | 100   | 100   | 98.9  | 100                                  | 99.7  | 98.9  | 96    | 100                                  | 100   | 99.4  | 98.9  |
| LEV  | 18                            | 94.4                       | 95.9  | 98.8  | 99.1  | 92.2                                 | 95.2  | 99    | 97.9  | 90.8                                 | 94.5  | 97.9  | 97.4  |
| LZD  | 19                            | 95.3                       | 94.8  | 98    | 98.6  | 83.3                                 | 90    | 93.5  | 93.8  | 87.7                                 | 88.9  | 91.6  | 92.5  |
| MXF  | 18                            | 90.9                       | 95.2  | 98.5  | 98.6  | 87.4                                 | 93.1  | 95.8  | 96.3  | 85.3                                 | 90    | 93.4  | 93.7  |
| PAS  | 0                             | -                          | -     | -     | -     | -                                    | -     | -     | -     | -                                    | -     | -     | -     |
| RFB  | 1                             | 100                        | 100   | 94.7  | 100   | 100                                  | 93.3  | 92.1  | 86.5  | 61.5                                 | 80    | 84.2  | 89.2  |
| RIF  | 4                             | 100                        | 100   | 96.7  | 98.4  | 84.8                                 | 97.1  | 91.9  | 84.9  | 91.1                                 | 96.2  | 92.7  | 85.7  |
| All  |                               | 95.7                       | 97.4  | 98.5  | 98.7  | 89.4                                 | 94.6  | 96.3  | 93.2  | 87.9                                 | 92.5  | 94.9  | 93.7  |

**Table S9.** Logistic mixed-effects models for inter-reader agreement and intra- and inter-laboratory reproducibilities (only Vizion, excluding Site F). Random effects were defined nested with respect to strains, sites and replicates.

|                   | Inter-reader agreement |         |              | Intra-laboratory reproducibility |       |              | Inter-laboratory reproducibility |       |              |
|-------------------|------------------------|---------|--------------|----------------------------------|-------|--------------|----------------------------------|-------|--------------|
|                   | Estimate               | SE      | p-value      | Estimate                         | SE    | p-value      | Estimate                         | SE    | p-value      |
| Intercept         | 4.708                  | 0.444   | <0.001       | 3.753                            | 0.235 | <0.001       | 3.620                            | 0.242 | <0.001       |
| READINGDAY        |                        |         |              |                                  |       |              |                                  |       |              |
| Day 7 vs 14       | -1.177                 | 0.542   | <b>0.030</b> | -0.949                           | 0.294 | <b>0.001</b> | -0.884                           | 0.303 | <b>0.004</b> |
| Day 10 vs 14      | -0.673                 | 0.548   | 0.219        | 0.259                            | 0.354 | 0.465        | 0.096                            | 0.349 | 0.784        |
| Day 21 vs 14      | 0.453                  | 0.661   | 0.493        | -0.908                           | 0.270 | <b>0.001</b> | -0.988                           | 0.271 | <0.001       |
| Drug              |                        |         |              |                                  |       |              |                                  |       |              |
| AMK vs RIF        | 0.725                  | 0.722   | 0.316        | 1.482                            | 0.504 | <b>0.003</b> | 1.079                            | 0.445 | <b>0.015</b> |
| BDQ vs RIF        | -0.003                 | 0.595   | 0.995        | -0.704                           | 0.280 | <b>0.012</b> | -1.674                           | 0.257 | <0.001       |
| CFZ vs RIF        | 0.193                  | 0.623   | 0.757        | -0.518                           | 0.287 | 0.071        | -1.094                           | 0.270 | <0.001       |
| DLM vs RIF        | 0.425                  | 0.662   | 0.521        | -0.272                           | 0.301 | 0.366        | -0.659                           | 0.286 | <b>0.021</b> |
| EMB vs RIF        | -0.308                 | 0.559   | 0.581        | -0.186                           | 0.305 | 0.543        | -0.235                           | 0.308 | 0.445        |
| ETH vs RIF        | 0.723                  | 0.722   | 0.317        | 0.160                            | 0.330 | 0.627        | -0.002                           | 0.324 | 0.994        |
| INH vs RIF        | 0.724                  | 0.722   | 0.316        | 0.269                            | 0.340 | 0.430        | -0.199                           | 0.311 | 0.522        |
| KAN vs RIF        | 1.845                  | 1.090   | 0.091        | 1.482                            | 0.504 | <b>0.003</b> | 1.237                            | 0.471 | <b>0.009</b> |
| LEV vs RIF        | 0.426                  | 0.662   | 0.520        | 1.139                            | 0.443 | <b>0.010</b> | 0.371                            | 0.355 | 0.297        |
| LZD vs RIF        | -0.165                 | 0.575   | 0.775        | -0.853                           | 0.274 | <b>0.002</b> | -1.174                           | 0.268 | <0.001       |
| MXF vs RIF        | 0.193                  | 0.623   | 0.757        | -0.307                           | 0.298 | 0.303        | -0.845                           | 0.278 | <b>0.002</b> |
| PAS vs RIF        | -2.244                 | 0.459   | <0.001       | -2.581                           | 0.243 | <0.001       | -2.943                           | 0.244 | <0.001       |
| RFB vs RIF        | 0.192                  | 0.623   | 0.758        | -0.050                           | 0.314 | 0.874        | -1.053                           | 0.271 | <0.001       |
| Day 7:AMK         | 1.009                  | 1.073   | 0.347        | -0.218                           | 0.627 | 0.728        | -0.083                           | 0.575 | 0.885        |
| Day 10:AMK        | 0.142                  | 0.951   | 0.881        | -0.902                           | 0.676 | 0.182        | -0.296                           | 0.642 | 0.645        |
| Day 21:AMK        | 0.695                  | 1.339   | 0.604        | 1.169                            | 0.727 | 0.108        | 1.415                            | 0.649 | <b>0.029</b> |
| Day 7:BDQ         | 1.732                  | 0.993   | 0.081        | -0.648                           | 0.358 | 0.070        | -0.036                           | 0.343 | 0.917        |
| Day 10:BDQ        | 1.584                  | 0.994   | 0.111        | -0.837                           | 0.417 | <b>0.044</b> | -0.426                           | 0.385 | 0.269        |
| Day 21:BDQ        | 0.301                  | 0.979   | 0.759        | -0.192                           | 0.336 | 0.568        | 0.389                            | 0.309 | 0.208        |
| Day 7:CFZ         | -0.193                 | 0.785   | 0.806        | 0.449                            | 0.389 | 0.248        | 0.880                            | 0.381 | 0.021        |
| Day 10:CFZ        | 0.440                  | 0.849   | 0.605        | -0.400                           | 0.437 | 0.360        | -0.083                           | 0.409 | 0.839        |
| <b>Day 21:CFZ</b> | -0.781                 | 0.895   | 0.383        | 1.011                            | 0.373 | <b>0.007</b> | 0.797                            | 0.332 | <b>0.016</b> |
| Day 7:DLM         | 0.145                  | 0.857   | 0.866        | 1.252                            | 0.455 | <b>0.006</b> | 0.737                            | 0.403 | 0.068        |
| Day 10:DLM        | -0.298                 | 0.834   | 0.721        | 0.003                            | 0.473 | 0.994        | -0.113                           | 0.431 | 0.793        |
| Day 21:DLM        | -2.033                 | 0.876   | <b>0.020</b> | -0.664                           | 0.354 | 0.060        | -0.244                           | 0.338 | 0.470        |
| Day 7:EMB         | 0.312                  | 0.736   | 0.672        | -0.073                           | 0.396 | 0.853        | -0.500                           | 0.394 | 0.205        |
| Day 10:EMB        | 1.893                  | 0.973   | 0.052        | -0.335                           | 0.463 | 0.470        | -0.451                           | 0.448 | 0.315        |
| Day 21:EMB        | 14.242                 | 314.704 | 0.964        | -0.418                           | 0.361 | 0.247        | -0.141                           | 0.362 | 0.697        |
| Day 7:ETH         | -0.469                 | 0.881   | 0.594        | 0.046                            | 0.431 | 0.915        | 0.070                            | 0.429 | 0.871        |
| Day 10:ETH        | -0.722                 | 0.875   | 0.409        | -0.529                           | 0.487 | 0.277        | -0.479                           | 0.467 | 0.306        |
| Day 21:ETH        | -1.158                 | 0.979   | 0.237        | -0.541                           | 0.385 | 0.161        | 0.269                            | 0.390 | 0.490        |
| Day 7:INH         | -0.603                 | 0.873   | 0.490        | 0.107                            | 0.446 | 0.811        | 0.260                            | 0.420 | 0.536        |
| Day 10:INH        | 0.852                  | 1.075   | 0.428        | -0.416                           | 0.506 | 0.412        | -0.203                           | 0.462 | 0.660        |
| Day 21:INH        | -1.322                 | 0.967   | 0.172        | -0.044                           | 0.407 | 0.914        | 0.661                            | 0.385 | 0.086        |
| Day 7:KAN         | -0.112                 | 1.349   | 0.934        | 0.727                            | 0.737 | 0.324        | 0.568                            | 0.681 | 0.404        |
| Day 10:KAN        | -0.978                 | 1.254   | 0.435        | -0.195                           | 0.763 | 0.799        | 0.114                            | 0.737 | 0.877        |

|            |        |       |       |        |       |              |        |       |                  |
|------------|--------|-------|-------|--------|-------|--------------|--------|-------|------------------|
| Day 21:KAN | -1.547 | 1.339 | 0.248 | -0.253 | 0.584 | 0.665        | 0.280  | 0.567 | 0.621            |
| Day 7:LEV  | -0.536 | 0.811 | 0.509 | -1.173 | 0.516 | 0.023        | -0.734 | 0.441 | 0.096            |
| Day 10:LEV | -0.649 | 0.813 | 0.425 | -1.837 | 0.558 | 0.001        | -1.135 | 0.480 | <b>0.018</b>     |
| Day 21:LEV | -0.126 | 1.021 | 0.902 | 0.158  | 0.537 | 0.768        | 0.812  | 0.453 | 0.073            |
| Day 7:LZD  | 0.166  | 0.748 | 0.825 | -0.184 | 0.357 | 0.606        | 0.395  | 0.363 | 0.277            |
| Day 10:LZD | -0.410 | 0.728 | 0.574 | -0.739 | 0.411 | 0.073        | -0.449 | 0.398 | 0.260            |
| Day 21:LZD | -0.067 | 0.895 | 0.940 | 0.946  | 0.349 | <b>0.007</b> | 1.152  | 0.336 | <b>0.001</b>     |
| Day 7:MXF  | -0.896 | 0.756 | 0.236 | -0.285 | 0.384 | 0.457        | -0.108 | 0.368 | 0.769            |
| Day 10:MXF | -0.604 | 0.773 | 0.435 | -0.796 | 0.439 | 0.069        | -0.600 | 0.409 | 0.142            |
| Day 21:MXF | -0.424 | 0.926 | 0.647 | 1.025  | 0.391 | <b>0.009</b> | 1.074  | 0.351 | <b>0.002</b>     |
| Day 7:PAS  | 1.174  | 0.616 | 0.057 | 1.469  | 0.333 | <b>0.000</b> | 2.262  | 0.349 | <b>&lt;0.001</b> |
| Day 10:PAS | 0.109  | 0.602 | 0.856 | 0.289  | 0.382 | 0.450        | 0.651  | 0.375 | 0.082            |
| Day 21:PAS | -0.165 | 0.713 | 0.816 | 0.040  | 0.296 | 0.893        | 0.022  | 0.294 | 0.941            |
| Day 7:RFB  | -0.498 | 0.770 | 0.518 | 0.012  | 0.411 | 0.977        | 0.118  | 0.363 | 0.744            |
| Day 10:RFB | 0.440  | 0.849 | 0.604 | -0.688 | 0.461 | 0.135        | -0.287 | 0.406 | 0.479            |
| Day 21:RFB | -0.425 | 0.926 | 0.647 | 0.611  | 0.397 | 0.123        | 1.183  | 0.343 | <b>0.001</b>     |

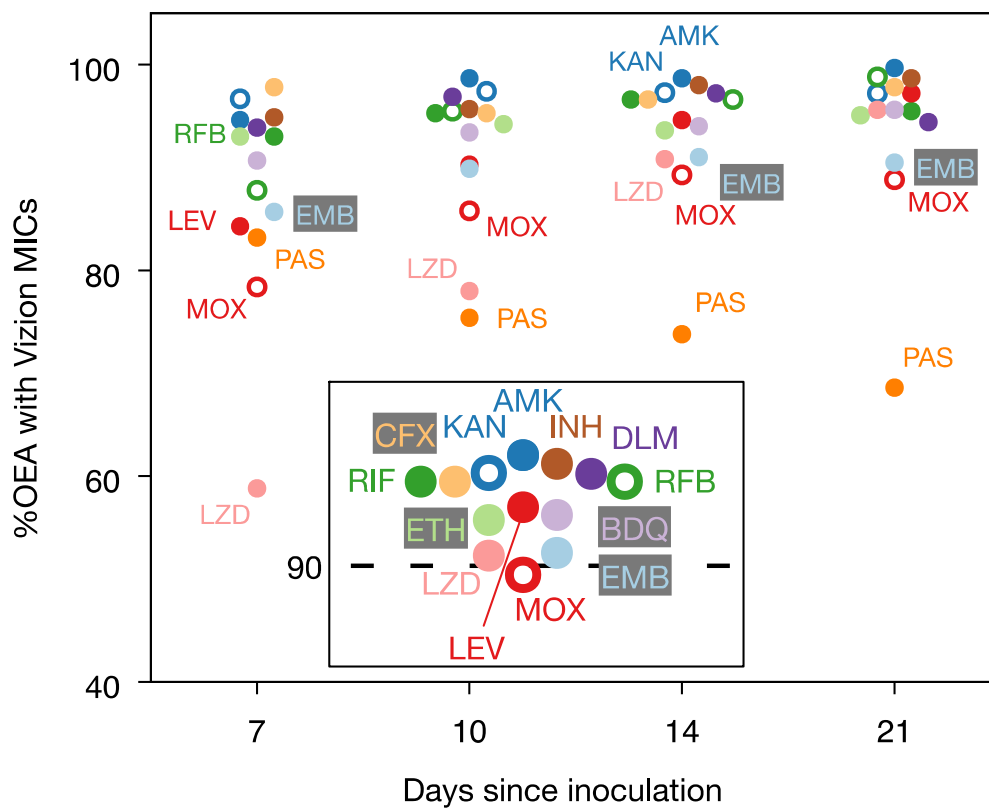

**Fig S4.** The proportion of results in agreement (OEA) between MICs read by Vizion™ and determined by the AMyGDA software (Table S9). Drugs are labelled using the abbreviations defined in Table S1.

**Table S10.** Related to Figure S3. The proportion of MICs read by Vizion™ in agreement ( $\pm 1$  doubling dilution) with those determined by the AMyGDA software.

|         | <b>Day 7</b> | <b>Day 10</b> | <b>Day 14</b> | <b>Day 21</b> |
|---------|--------------|---------------|---------------|---------------|
| AMK     | 94.6         | 98.7          | 98.7          | 99.7          |
| BDQ     | 90.7         | 93.4          | 94.0          | 95.6          |
| CFZ     | 97.8         | 95.3          | 96.6          | 97.8          |
| DLM     | 93.9         | 96.9          | 97.2          | 94.4          |
| EMB     | 85.7         | 89.9          | 91.0          | 90.5          |
| ETH     | 93.0         | 94.2          | 93.6          | 95.1          |
| INH     | 94.9         | 95.7          | 98.0          | 98.7          |
| KAN     | 96.7         | 97.4          | 97.3          | 97.2          |
| LEV     | 84.3         | 90.3          | 94.6          | 97.2          |
| LZD     | 58.8         | 78.0          | 90.8          | 95.6          |
| MOX     | 78.4         | 85.8          | 89.3          | 88.8          |
| PAS     | 83.2         | 75.4          | 73.8          | 68.6          |
| RFB     | 87.8         | 95.5          | 96.6          | 98.8          |
| RIF     | 93.0         | 95.3          | 96.6          | 95.5          |
| Average | 88.1         | 91.6          | 93.4          | 93.8          |

**Table S11.** Logistic mixed-effects models for the agreement between measurements taken using the Vizion™ reading system and the AMyGDA (automated Mycobacterial growth detection algorithm) software. Random effects were defined nested with respect to strains, sites and replicates.

|                   | Estimate      | SE           | p-value          |
|-------------------|---------------|--------------|------------------|
| Intercept         | 3.574         | 0.357        | <0.001           |
| READINGDAY        |               |              |                  |
| Day 7 vs 14       | -0.696        | 0.475        | 0.143            |
| Day 10 vs 14      | -0.324        | 0.457        | 0.479            |
| Day 21 vs 14      | -0.275        | 0.433        | 0.525            |
| Drug              |               |              |                  |
| AMK vs RIF        | 1.056         | 0.605        | 0.081            |
| BDQ vs RIF        | -0.601        | 0.419        | 0.152            |
| CFZ vs RIF        | 0.043         | 0.465        | 0.927            |
| DLM vs RIF        | 0.282         | 0.492        | 0.566            |
| <b>EMB vs RIF</b> | <b>-1.049</b> | <b>0.393</b> | <b>0.008</b>     |
| ETH vs RIF        | -0.646        | 0.411        | 0.116            |
| INH vs RIF        | 0.534         | 0.532        | 0.316            |
| KAN vs RIF        | 0.358         | 0.492        | 0.467            |
| LEV vs RIF        | -0.439        | 0.423        | 0.299            |
| <b>LZD vs RIF</b> | <b>-1.048</b> | <b>0.391</b> | <b>0.007</b>     |
| <b>MXF vs RIF</b> | <b>-1.234</b> | <b>0.384</b> | <b>0.001</b>     |
| <b>PAS vs RIF</b> | <b>-2.465</b> | <b>0.360</b> | <b>&lt;0.001</b> |
| RFB vs RIF        | 0.043         | 0.465        | 0.926            |
| Day 7:AMK         | -0.652        | 0.790        | 0.410            |
| Day 10:AMK        | 0.399         | 0.900        | 0.657            |
| Day 21:AMK        | 1.783         | 1.205        | 0.139            |
| Day 7:BDQ         | 0.388         | 0.621        | 0.532            |
| Day 10:BDQ        | 0.272         | 0.594        | 0.647            |
| Day 21:BDQ        | 0.703         | 0.582        | 0.227            |
| Day 7:CFZ         | 1.242         | 0.827        | 0.133            |
| Day 10:CFZ        | -0.014        | 0.646        | 0.982            |
| <b>Day 21:CFZ</b> | <b>0.805</b>  | <b>0.667</b> | <b>0.228</b>     |
| Day 7:DLM         | -0.023        | 0.709        | 0.974            |
| Day 10:DLM        | 0.251         | 0.704        | 0.721            |
| Day 21:DLM        | -0.453        | 0.625        | 0.468            |
| Day 7:EMB         | 0.189         | 0.578        | 0.743            |
| Day 10:EMB        | 0.201         | 0.553        | 0.717            |
| Day 21:EMB        | 0.246         | 0.523        | 0.639            |
| Day 7:ETH         | 0.678         | 0.634        | 0.285            |
| Day 10:ETH        | 0.463         | 0.591        | 0.433            |
| Day 21:ETH        | 0.571         | 0.567        | 0.314            |
| Day 7:INH         | -0.105        | 0.749        | 0.889            |
| Day 10:INH        | -0.432        | 0.702        | 0.538            |
| Day 21:INH        | 0.793         | 0.787        | 0.314            |
| Day 7:KAN         | 0.513         | 0.758        | 0.499            |
| Day 10:KAN        | 0.377         | 0.720        | 0.601            |
| Day 21:KAN        | 0.201         | 0.662        | 0.762            |
| Day 7:LEV         | -0.467        | 0.596        | 0.433            |
| Day 10:LEV        | -0.356        | 0.576        | 0.537            |
| Day 21:LEV        | 0.997         | 0.613        | 0.104            |
| <b>Day 7:LZD</b>  | <b>-1.408</b> | <b>0.551</b> | <b>0.011</b>     |
| Day 10:LZD        | -0.829        | 0.531        | 0.118            |
| <b>Day 21:LZD</b> | <b>1.143</b>  | <b>0.557</b> | <b>0.040</b>     |
| Day 7:MXF         | -0.126        | 0.557        | 0.822            |
| Day 10:MXF        | -0.011        | 0.534        | 0.984            |
| Day 21:MXF        | 0.248         | 0.510        | 0.627            |
| <b>Day 7:PAS</b>  | <b>1.373</b>  | <b>0.550</b> | <b>0.013</b>     |
| Day 10:PAS        | 0.417         | 0.506        | 0.410            |
| Day 21:PAS        | -0.003        | 0.474        | 0.995            |
| Day 7:RFB         | -0.660        | 0.635        | 0.299            |
| Day 10:RFB        | 0.049         | 0.645        | 0.940            |
| Day 21:RFB        | 1.344         | 0.743        | 0.071            |



**Table S12.** Related to Figure 3. The agreement (between UKMYC5 MICs read by Vizion™ and frozen-form microtiter plate MICs).

|         | %agreement with the frozen-form microtitre plate mode MICs after: |                |
|---------|-------------------------------------------------------------------|----------------|
|         | <b>14 days</b>                                                    | <b>21 days</b> |
| AMK     | 100.0                                                             | 100.0          |
| BDQ     | 100.0                                                             | 95.6           |
| CFZ     | 96.8                                                              | 95.6           |
| EMB     | 98.7                                                              | 83.0           |
| INH     | 97.4                                                              | 91.8           |
| KAN     | 92.4                                                              | 65.2           |
| LEV     | 99.4                                                              | 98.1           |
| LZD     | 99.4                                                              | 97.5           |
| MXF     | 98.7                                                              | 98.1           |
| RIF     | 100.0                                                             | 99.4           |
| Overall | 98.3                                                              | 92.4           |

**Table S13.** Categorical and conditional agreements with APM and MGIT.

Categorical and conditional agreements of CRyPTIC's microtitre plate MICs at day 14 with categorical and quantitative results obtained with MGIT and APM, along with sensitivity and specificity values for the drugs included in the panel for which suitable breakpoints are established, are shown below. Categorical agreement with MGIT results ranged from 100% for AMK, KAN, LEV, PAS, RFB, RIF to 89.5% for BDQ, DLM and EMB. Conditional agreement was higher than categorical for clofazimine. We also calculated the agreements with APM for all drugs, with the exception of PAS and ETH. The lowest categorical agreement was observed for CFZ, INH and MXF.

| drug | APM       |                                  |                   |         |                        |                        |                |                 | MGIT           |                                  |        |         |                        |                        |                |                 |
|------|-----------|----------------------------------|-------------------|---------|------------------------|------------------------|----------------|-----------------|----------------|----------------------------------|--------|---------|------------------------|------------------------|----------------|-----------------|
|      | APM<br>CC | C<br>R<br>Y<br>P<br>T<br>I<br>C* | AGAR <sup>+</sup> |         | Sensitivity<br>(95%CI) | Specificity<br>(95%CI) | % Cat.<br>Agr. | % Cond.<br>Agr. | MGIT<br>cutoff | C<br>R<br>Y<br>P<br>T<br>I<br>C* | MGIT   |         | Sensitivity<br>(95%CI) | Specificity<br>(95%CI) | % Cat.<br>Agr. | % Cond.<br>Agr. |
|      |           |                                  | R                 | S       |                        |                        |                |                 |                |                                  | R      | S       |                        |                        |                |                 |
| AMK  | 2         | R<br>S                           | 2<br>0            | 0<br>15 | 100<br>(34.2-100)      | 100<br>(79.6-100)      | 100            | 100             | 1              | R<br>S                           | 3<br>0 | 0<br>16 | 100<br>(43.9-100)      | 100<br>(80.6-100)      | 100            | 100             |
| BDQ  | 0.25      | R<br>S                           | 1<br>0            | 1<br>16 | 100<br>(20.7-100)      | 94.1<br>(73-99)        | 94.4           | 100             | 1              | R<br>S                           | 0<br>2 | 0<br>17 | 0<br>(0-65.8)          | 100<br>(81.6-100)      | 89.5           | 89.5            |
| CFZ  | 0.5       | R<br>S                           | 0<br>1            | 1<br>16 | 0<br>(0-79.3)          | 94.1<br>(73-99)        | 88.9           | 94.4            | 1              | R<br>S                           | 0<br>2 | 0<br>17 | 0<br>(0-65.8)          | 100<br>(81.6-100)      | 89.5           | 94.7            |
| DLM  | 0.06      | R<br>S                           | 2<br>0            | 0<br>14 | 100<br>(34.2-100)      | 100<br>(78.5-100)      | 100            | 100             | 0.12           | R<br>S                           | 1<br>1 | 1<br>16 | 50<br>(9.5-90.5)       | 94.1<br>(73-99)        | 89.5           | 89.5            |
| EMB  | 5         | R<br>S                           | 3<br>1            | 0<br>14 | 75<br>(30.1-95.4)      | 100<br>(78.5-100)      | 94.4           | 94.4            | 5              | R<br>S                           | 2<br>1 | 1<br>15 | 66.7<br>(20.8-93.9)    | 93.8<br>(71.7-98.9)    | 89.5           | 89.5            |
| ETH  | 5         | R<br>S                           |                   |         |                        |                        |                |                 | 5              | R<br>S                           | 3<br>1 | 0<br>15 | 75<br>(30.1-95.4)      | 100<br>(79.6-100)      | 94.7           | 94.7            |
| INH  | 0.2       | R<br>S                           | 8<br>2            | 0<br>8  | 80<br>(49-94.3)        | 100<br>(67.6-100)      | 88.9           | 94.4            | 0.1            | R<br>S                           | 9<br>0 | 0<br>10 | 100<br>(70.1-100)      | 100<br>(72.2-100)      | 100            | 100             |
| KAN  | 4         | R<br>S                           | 3<br>0            | 0<br>15 | 100<br>(43.9-100)      | 100<br>(79.6-100)      | 100            | 100             | 2.5            | R<br>S                           | 3<br>0 | 0<br>16 | 100<br>(43.9-100)      | 100<br>(80.6-100)      | 100            | 100             |
| LEV  | 1         | R<br>S                           | 3<br>0            | 1<br>14 | 100<br>(43.9-100)      | 93.3<br>(70.2-98.8)    | 94.4           | 100             | 1              | R<br>S                           | 4<br>0 | 0<br>15 | 100<br>(51-100)        | 100<br>(79.6-100)      | 100            | 100             |
| LZD  | 1         | R<br>S                           | 0<br>0            | 0<br>18 |                        | 100<br>(82.4-100)      | 100            | 100             | 1              | R<br>S                           | 0<br>1 | 0<br>18 | 0<br>(0-79.3)          | 100<br>(82.4-100)      | 94.7           | 94.7            |
| MXF  | 0.5       | R<br>S                           | 2<br>0            | 2<br>14 | 100<br>(34.2-100)      | 87.5<br>(64-96.5)      | 88.9           | 94.4            | 0.5            | R<br>S                           | 4<br>0 | 0<br>15 | 100<br>(51-100)        | 100<br>(79.6-100)      | 100            | 100             |
| PAS  | 2         | R<br>S                           |                   |         |                        |                        |                |                 | 4              | R<br>S                           | 2<br>0 | 0<br>16 | 100<br>(34.2-100)      | 100<br>(80.6-100)      | 100            | 100             |
| RFB  | 0.5       | R<br>S                           | 5<br>0            | 1<br>12 | 100<br>(56.6-100)      | 92.3<br>(66.7-98.6)    | 94.4           | 94.4            | 1              | R<br>S                           | 7<br>0 | 0<br>12 | 100<br>(64.6-100)      | 100<br>(75.8-100)      | 100            | 100             |
| RIF  | 1         | R<br>S                           | 5<br>0            | 1<br>12 | 100<br>(56.6-100)      | 92.3<br>(66.7-98.6)    | 94.4           | 94.4            | 1              | R<br>S                           | 7<br>0 | 0<br>12 | 100<br>(64.6-100)      | 100<br>(75.8-100)      | 100            | 100             |

**Table S14.** Related to Table S12. The cells shaded grey are the drug/strain classification discrepancies between the reference method (APM or MGIT) and the mode MIC determined using the UKMYC plate. In each comparison the critical concentration (CC, for APM) or cutoff (for MGIT) is assumed to apply to the UKMYC5 plate. As one might expect many of MICs are close to the CC or cutoff and therefore the classification by UKMYC5 plate may change when critical concentrations are established.

| drug | strain            | Gene Mutations                       | AGAR   |       |     |        | MGIT |              |          |       |     |
|------|-------------------|--------------------------------------|--------|-------|-----|--------|------|--------------|----------|-------|-----|
|      |                   |                                      | APM CC | AGAR  |     | UKMYC5 |      | MGIT cut-off | MGIT R/S | UKMIC |     |
|      |                   |                                      |        | mic   | S/R | Mic    | S/R  |              |          | mic   | S/R |
| BDQ  | CRY-15;<br>CRY-21 | <i>Rv0678</i><br>Tyr92_STOP          | 0.25   | 0.12  | S   | 0.5    | R    | 1            | R        | 0.5   | S   |
| CFZ  | CRY-9;<br>CRY-22  | <i>Rv0678</i><br>Del A: Gln115_fs    | 0.5    | 0.5   | S   | 1      | R    | 1            | R        | 1     | S   |
| CFZ  | CRY-15;<br>CRY-21 | <i>Rv0678</i><br>Tyr92_STOP          | 0.5    | 1     | R   | 0.25   | S    | 1            | R        | 0.25  | S   |
| EMB  | CRY-14            | <i>embB</i><br>Met306Ile             | 5      | 8     | R   | 4      | S    | 5            | R        | 4     | S   |
| INH  | CRY-4;<br>CRY-30  | Wildtype                             | 0.2    | 0.4   | R   | 0.05   | S    | 0.1          | S        | 0.05  | S   |
| INH  | CRY-20            | <i>prom fabG1-inhA</i><br>-15 c -> t | 0.2    | 0.4   | R   | 0.2    | S    | 0.1          | R        | 0.2   | R   |
| LEV  | CRY-7;<br>CRY-18  | <i>gyrA</i><br>Ala90Val              | 1      | 0.25  | S   | 2      | R    | 1            | R        | 2     | R   |
| MXF  | CRY-2;<br>CRY-25  | <i>gyrA</i><br>Ala90Val              | 0.5    | 0.25  | S   | 2      | R    | 0.5          | R        | 2     | R   |
| MXF  | CRY-7;<br>CRY-18  | <i>gyrA</i><br>Ala90Val              | 0.5    | 0.25  | S   | 1      | R    | 0.5          | R        | 1     | R   |
| RFB  | CRY-7;<br>CRY-18  | <i>rpoB</i><br>Ser450Leu             | 0.5    | 0.5   | S   | 4      | R    | 1            | R        | 4     | R   |
| RIF  | CRY-1;<br>CRY-17  | <i>rpoB</i><br>Ser450Leu             | 1      | 1     | S   | 8      | R    | 1            | R        | 8     | R   |
| BDQ  | CRY-9;<br>CRY-22  | <i>Rv0678</i><br>Del A: Gln115_fs    | 0.25   | 0.5   | R   | 0.5    | R    | 1            | R        | 0.5   | S   |
| DLM  | CRY-9;<br>CRY-22  | <i>Rv1173</i><br>Arg536Leu           | 0.06   | 0.25  | R   | 0.5    | R    | 0.12         | S        | 0.5   | R   |
| DLM  | CRY-15;<br>CRY-21 | Wildtype                             | 0.06   | 0.015 | S   | 0.015  | S    | 0.12         | R        | 0.015 | S   |
| EMB  | CRY-5;<br>CRY10   | <i>embB</i><br>Gln497Arg             | 5      | 8     | R   | 16     | R    | 5            | S        | 16    | R   |
| ETH  | CRY-1;<br>CRY-17  | Wildtype                             | 5      | NA    | NA  | 2      | S    | 5            | R        | 2     | S   |
| LZD  | CRY-5;<br>CRY10   | Wildtype                             | 1      | 0.25  | S   | 0.5    | S    | 1            | R        | 0.5   | S   |

**Table S15.** Resistance patterns and genotype of the strains. The critical concentrations used for APM and MGIT are reported in Table S12. The high confidence mutations used to define strains as resistant to the relevant drug are highlighted in red – the other mutations are shown for information only. All non-synonymous mutations found in candidate resistance genes for DLM, BDQ, CLF, ETH, LZD, PAS are included in this list because the genetic basis for resistance to these drugs is not well characterized. Each APM or REMA result is the consensus of two measurements; in discrepant cases the lower value is chosen. This is a summary of Table S22.

| Drug          | Strain         | MGIT      | MIC APM   | MIC REMA    | gene                   | mutations        |
|---------------|----------------|-----------|-----------|-------------|------------------------|------------------|
| Amikacin      | CRY-12; CRY-24 | R         | n/d       | > 16        | <i>rrs</i>             | a1401g           |
|               | CRY-14         | R         | > 16 (R)  | > 16        | <i>rrs</i>             | a1401g           |
|               | CRY-7; CRY-18  | R         | > 16 (R)  | > 16        | <i>rrs</i>             | a1401g           |
| Bedaquiline   | CRY-12; CRY-24 | S         | 0.015 (S) | 0.5         | <i>Rv0678</i>          | Ins G: Arg140_fs |
|               | CRY-15; CRY-21 | R         | 0.12 (S)  | 2           | <i>Rv0678</i>          | Tyr92_STOP       |
|               | CRY-8; CRY-13  | S         | 0.015 (S) | 0.06        | <i>Rv0678</i>          | Val3Ile          |
|               | CRY-9; CRY-22  | R         | 0.5 (R)   | 0.25        | <i>Rv0678</i>          | Del A: Gln115_fs |
| Clofazimine   | CRY-12; CRY-24 | S         | 0.03 (S)  | 0.5         | <i>Rv0678</i>          | Ins G: Arg140_fs |
|               | CRY-15; CRY-21 | R         | 1 (R)     | 1           | <i>Rv0678</i>          | Tyr92_STOP       |
|               | CRY-8; CRY-13  | S         | 0.25 (S)  | 0.06        | <i>Rv0678</i>          | Val3Ile          |
|               | CRY-9; CRY-22  | R         | 0.5 (S)   | 1           | <i>Rv0678</i>          | Del A: Gln115_fs |
| Delamanid     | CRY-1; CRY-17  | R         | 4 (R)     | > 2         | <i>ddn</i>             | Trp88_STOP       |
|               | CRY-9; CRY-22  | S         | 0.25 (R)  | 2           | <i>fbtC</i>            | Arg536Leu        |
| Ethambutol    | CRY-14         | R         | 8 (R)     | 4           | <i>embB</i>            | Met306Ile        |
|               | CRY-5; CRY-10  | S         | 8 (R)     | 16          | <i>embB</i>            | Gln497Arg        |
|               | CRY-7; CRY-18  | R         | 16 (R)    | 8           | <i>embB</i>            | Met306Val        |
|               | CRY-8; CRY-13  | R         | 16 (R)    | 8           | <i>embB</i>            | Met306Ile        |
| Ethionamide   | CRY-20         | R         | n/d       | n/d         | <i>prom fabG1-inhA</i> | -15 c-> t        |
|               | CRY-5; CRY-10  | R         | n/d       | n/d         | <i>ethA</i>            | Asp357Tyr        |
|               | CRY-5; CRY-10  | R         | n/d       | n/d         | <i>inhA</i>            | Asn231Asp        |
|               | CRY-7; CRY-18  | R         | n/d       | n/d         | <i>ethA</i>            | Del T: Lys37_fs  |
|               | CRY-7; CRY-18  | R         | n/d       | n/d         | <i>prom fabG1-inhA</i> | -34 c -> Del     |
| Isoniazid     | CRY-1; CRY-17  | R         | 3.2 (R)   | > 8         | <i>katG</i>            | Ser315Thr        |
|               | CRY-14         | R         | 3.2 (R)   | > 8         | <i>katG</i>            | Ser315Thr        |
|               | CRY-20         | R         | 0.4 (R)   | 1           | <i>prom fabG1-inhA</i> | -15 c -> t       |
|               | CRY-23         | R         | > 6.4 (R) | > 8         | <i>katG</i>            | Ser315Thr        |
|               | CRY-28         | R         | > 6.4 (R) | > 8         | <i>katG</i>            | Ser315Thr        |
|               | CRY-5; CRY-10  | R         | > 6.4 (R) | > 8         | <i>katG</i>            | Ser315Thr        |
|               | CRY-6; CRY-29  | R         | > 6.4 (R) | > 8         | <i>katG</i>            | Ser315Thr        |
|               | CRY-7; CRY-18  | R         | 1.6 (R)   | > 8         | <i>katG</i>            | Ser315Thr        |
|               | CRY-7; CRY-18  | R         | 1.6 (R)   | > 8         | <i>prom fabG1-inhA</i> | -34 c -> Del     |
| CRY-8; CRY-13 | R              | > 6.4 (R) | > 8       | <i>katG</i> | Ser315Thr              |                  |
| Kanamycin     | CRY-12; CRY-24 | R         | > 16 (R)  | > 32        | <i>rrs</i>             | a1401g           |
|               | CRY-14         | R         | 16 (R)    | > 32        | <i>rrs</i>             | a1401g           |
|               | CRY-7; CRY-18  | R         | 8 (R)     | > 32        | <i>rrs</i>             | a1401g           |

|                          |               |    |          |       |             |           |
|--------------------------|---------------|----|----------|-------|-------------|-----------|
| Levofloxacin             | CRY-2; CRY-25 | R  | 2 (R)    | 2     | <i>gyrA</i> | Ala90Val  |
|                          | CRY-5; CRY-10 | R  | 8 (R)    | 8     | <i>gyrA</i> | Ala90Val  |
|                          | CRY-5; CRY-10 | R  | 8 (R)    | 8     | <i>gyrA</i> | Ser91Pro  |
|                          | CRY-7; CRY-18 | R  | 0.25 (S) | 1     | <i>gyrA</i> | Ala90Val  |
|                          | CRY-8; CRY-13 | R  | 4 (R)    | 2     | <i>gyrA</i> | Ala90Val  |
| Linezolid                | CRY-16        | S  | 0.5 (S)  | 0.25  | <i>rrl</i>  | c344t     |
|                          | CRY-23        | S  | 0.5 (S)  | 0.25  | <i>rrl</i>  | g1052t    |
|                          | CRY-26        | S  | 0.25 (S) | n/d   | <i>rrl</i>  | c344t     |
| Moxifloxacin             | CRY-2; CRY-25 | R  | 0.25 (S) | 0.25  | <i>gyrA</i> | Ala90Val  |
|                          | CRY-5; CRY-10 | R  | 4 (R)    | 2     | <i>gyrA</i> | Ala90Val  |
|                          | CRY-5; CRY-10 | R  | 4 (R)    | 2     | <i>gyrA</i> | Ser91Pro  |
|                          | CRY-7; CRY-18 | R  | 0.25 (S) | 0.25  | <i>gyrA</i> | Ala90Val  |
|                          | CRY-8; CRY-13 | R  | 2 (R)    | 0.5   | <i>gyrA</i> | Ala90Val  |
| Para-aminosalicylic acid | CRY-23        | R  | n/d      | n/d   | <i>thyA</i> | Val261Gly |
|                          | CRY-9; CRY-22 | NA | n/d      | n/d   | <i>folC</i> | Pro104Gln |
| Rifabutin                | CRY-1; CRY-17 | R  | 2 (R)    | > 2   | <i>rpoB</i> | Ser450Leu |
|                          | CRY-14        | R  | 2 (R)    | 0.125 | <i>rpoB</i> | Ser450Leu |
|                          | CRY-27        | R  | n/d      | > 2   | <i>rpoB</i> | Ser450Leu |
|                          | CRY-28        | R  | 2 (R)    | 1     | <i>rpoB</i> | Ser450Leu |
|                          | CRY-5; CRY-10 | R  | 1 (R)    | 1     | <i>rpoB</i> | Ser450Leu |
|                          | CRY-7; CRY-18 | R  | 0.5 (S)  | 2     | <i>rpoB</i> | Ser450Leu |
|                          | CRY-8; CRY-13 | R  | 4 (R)    | 2     | <i>rpoB</i> | Ser450Leu |
| Rifampicin               | CRY-1; CRY-17 | R  | 1 (R)    | > 4   | <i>rpoB</i> | Ser450Leu |
|                          | CRY-14        | R  | 2 (R)    | 2     | <i>rpoB</i> | Ser450Leu |
|                          | CRY-27        | R  | n/d      | > 4   | <i>rpoB</i> | Ser450Leu |
|                          | CRY-28        | R  | 4 (R)    | > 4   | <i>rpoB</i> | Ser450Leu |
|                          | CRY-5; CRY-10 | R  | 2 (R)    | > 4   | <i>rpoB</i> | Ser450Leu |
|                          | CRY-7; CRY-18 | R  | 16 (R)   | > 4   | <i>rpoB</i> | Ser450Leu |
|                          | CRY-8; CRY-13 | R  | 16 (R)   | > 4   | <i>rpoB</i> | Ser450Leu |

**Table S16.** Mutations related to drug resistance identified by whole genome sequencing analysis of the EQA strains. *M. tuberculosis* H37Rv genome GenBank number NC\_000962.3 was used as reference genome. The abbreviated lineages are: Euro American Super (EAS) lineage, East African-Indian (EAI) lineage and Latin American-Mediterranean (LAM) lineage. In red are indicated the high confidence mutations. Synonymous and phylogenetic SNPs were not considered for this analysis

| DRUGS     | genes                 | STRAIN (LINEAGE)      |                   |                   |                    |                       |                       |                        |                       |                     |                   |        |                   |                     |                 |                     |                 |          |                 |                 |
|-----------|-----------------------|-----------------------|-------------------|-------------------|--------------------|-----------------------|-----------------------|------------------------|-----------------------|---------------------|-------------------|--------|-------------------|---------------------|-----------------|---------------------|-----------------|----------|-----------------|-----------------|
|           |                       | CRY-1;17<br>(Beijing) | CRY-4;30<br>(EAS) | CRY-9;22<br>(EAI) | CRY 15;21<br>(EAI) | CRY-7;18<br>(Beijing) | CRY-5;10<br>(Beijing) | CRY-12;24<br>(Haarlem) | CRY-6;29<br>(Beijing) | CRY-14<br>(Beijing) | CRY-8;13<br>(LAM) | CRY-16 | CRY-2;25<br>(EAI) | CRY-19<br>(Haarlem) | CRY-26<br>(EAS) | CRY-27<br>(Haarlem) | CRY-28<br>(LAM) | CRY-3;11 | CRY-20<br>(LAM) | CRY-23<br>(EAI) |
| DLM       | <i>catH</i> (Fv354?)  | Trp88_STOP            | -                 | -                 | -                  | -                     | -                     | -                      | -                     | -                   | -                 | -      | -                 | -                   | -               | -                   | -               | -        | -               | -               |
|           | <i>ispH</i> (Fv040?)  | -                     | -                 | -                 | -                  | -                     | -                     | -                      | -                     | -                   | -                 | -      | -                 | -                   | -               | -                   | -               | -        | -               | -               |
|           | <i>RvA</i> (Fv326?)   | -                     | -                 | -                 | -                  | -                     | -                     | -                      | -                     | -                   | -                 | -      | -                 | -                   | -               | -                   | -               | -        | -               | -               |
|           | <i>RvB</i> (Fv326?)   | -                     | -                 | -                 | -                  | -                     | -                     | -                      | -                     | -                   | -                 | -      | -                 | -                   | -               | -                   | -               | -        | -               | -               |
| BDQ       | <i>RvC</i> (Fv117?)   | -                     | -                 | Arg536Leu         | -                  | -                     | -                     | -                      | -                     | -                   | -                 | -      | -                 | -                   | -               | -                   | -               | -        | -               | -               |
|           | <i>atpE</i> (Fv130?)  | -                     | -                 | -                 | -                  | -                     | -                     | -                      | -                     | -                   | -                 | -      | -                 | -                   | -               | -                   | -               | -        | -               | -               |
| BDQ-CLF   | <i>Fv067?</i>         | -                     | -                 | Del A: Gln115_fs  | Tyr92_STOP         | -                     | -                     | Ins G: Arg140_fs       | -                     | -                   | Val31le           | -      | -                 | -                   | -               | -                   | -               | -        | -               | -               |
| INH       | <i>katG</i> (Fv1506?) | Ser315Thr             | -                 | -                 | -                  | Ser315Thr             | Ser315Thr             | -                      | Ser315Thr             | Ser315Thr           | Ser315Thr         | -      | -                 | -                   | -               | Phe332Val           | Ser315Thr       | -        | -               | Ser315Thr       |
|           | <i>RabG1</i> (Fv146?) | -                     | -                 | -                 | -                  | -34 c -> Del          | -                     | -                      | -60 c -> t            | -                   | -                 | -      | -                 | -                   | -               | -                   | -               | -        | -15 c -> t      | -               |
| INH-ETH   | <i>inhA</i> (Fv149?)  | -                     | -                 | -                 | -                  | -                     | Asn231Asp             | -                      | -                     | -                   | -                 | -      | -                 | -                   | -               | -                   | -               | -        | -               | -               |
| ETH       | <i>ethA</i> (Fv365?)  | -                     | -                 | -                 | -                  | Del T: Lys37_fs       | Asp357Tyr             | -                      | -                     | -                   | -                 | -      | -                 | -                   | -               | -                   | -               | -        | -               | -               |
| RIF - RFB | <i>rpoB</i> (Fv066?)  | Ser450Leu             | -                 | -                 | -                  | Ser450Leu             | Ser450Leu             | -                      | -                     | Ser450Leu           | Ser450Leu         | -      | -                 | -                   | -               | Ser450Leu           | Ser450Leu       | -        | -               | -               |
| EMB       | <i>embB</i> (Fv373?)  | Asp354Ala             | -                 | -                 | -                  | Met306Val             | Gln497Arg; Thr1082Ala | -                      | -                     | Met306Ile           | Met306Ile         | -      | -                 | -                   | -               | -                   | -               | -        | -               | -               |
| LEV-IMX   | <i>gyrA</i> (Fv000?)  | -                     | -                 | -                 | -                  | Ala90Val              | Ala90Val; Ser91Pro    | -                      | -                     | -                   | Ala90Val          | -      | Ala90Val          | -                   | -               | -                   | -               | -        | -               | -               |
|           | <i>gyrE</i> (Fv000?)  | -                     | -                 | -                 | Del CGC; pos 7159  | -                     | -                     | -                      | -                     | -                   | -                 | -      | -                 | -                   | -               | -                   | -               | -        | -               | -               |
| AMK-KAN   | <i>rrs</i> (Fvrr01)   | -                     | -                 | -                 | -                  | a140Ig                | -                     | a140Ig                 | -                     | -                   | -                 | a514c  | c1300t            | -                   | -               | -                   | -               | -        | -               | a514c           |
|           | <i>eis</i> (Fv241?)   | -                     | -                 | -                 | -                  | -                     | -                     | -                      | -                     | -                   | -                 | -      | -                 | -                   | -               | -                   | -               | -        | -               | -               |
| LZD       | <i>rplC</i> (Fv070?)  | -                     | -                 | -                 | -                  | -                     | -                     | -                      | -                     | -                   | -                 | -      | -                 | -                   | -               | -                   | -               | -        | -               | -               |
|           | <i>rplL</i> (Fvrr02)  | -                     | -                 | -                 | -                  | -                     | -                     | -                      | -                     | -                   | c344t             | -      | -                 | c344t               | -               | -                   | -               | -        | -               | g1052t          |
| PAS       | <i>thxB</i> (Fv276?)  | -                     | -                 | -                 | -                  | -                     | -                     | -                      | -                     | -                   | -                 | -      | -                 | -                   | -               | -                   | -               | -        | -               | Val261Gly       |
|           | <i>folC</i> (Fv244?)  | -                     | -                 | Pro104Gln         | -                  | -                     | -                     | -                      | -                     | -                   | -                 | -      | -                 | -                   | -               | -                   | -               | -        | -               | -               |

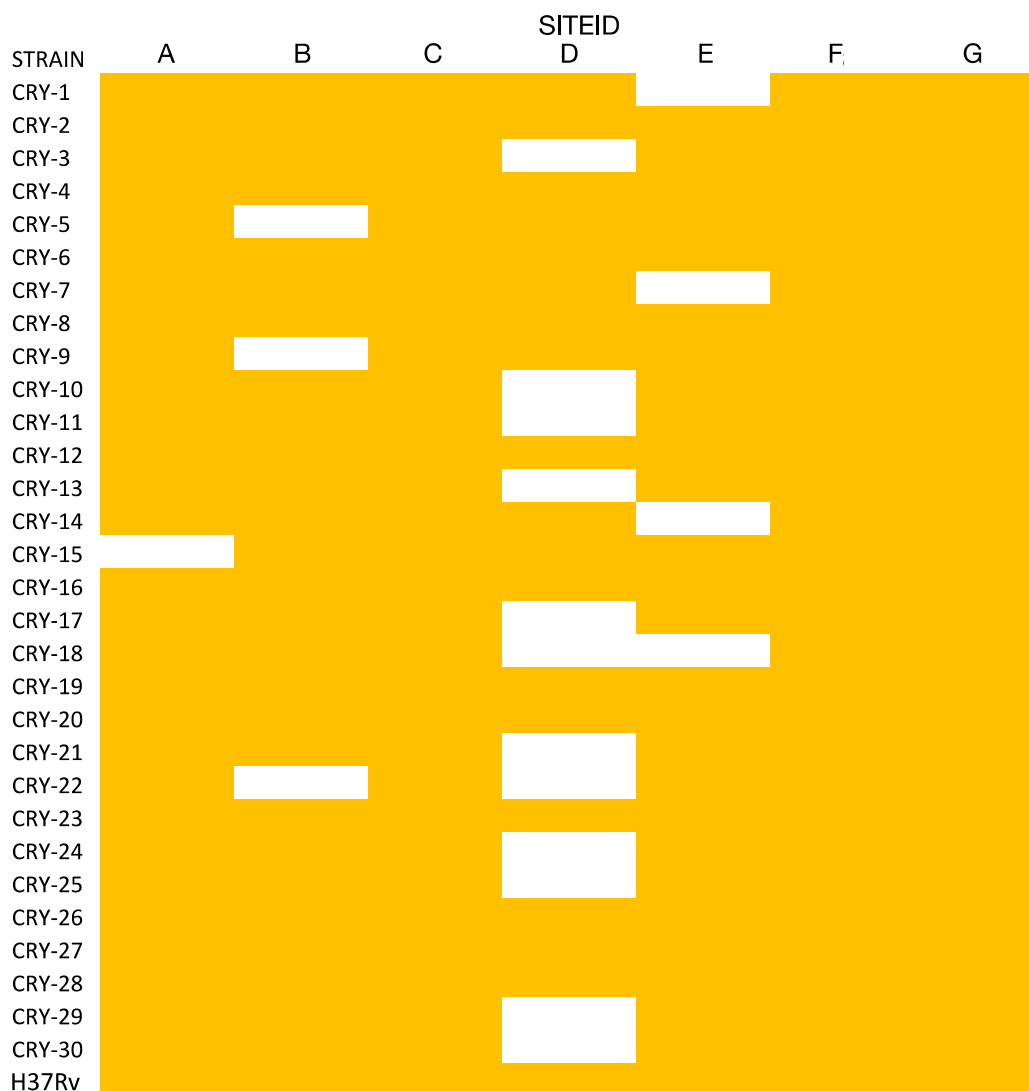

**Figure S5.** The seven participating laboratories received up to 31 vials of *M. tuberculosis* containing nineteen distinct external quality assurance (EQA) strains as described in the Material and Methods. A white rectangle indicates that site did not process that vial. Several sites, notable Site D, only received a subset of the vials for operational reasons.

**Table S17.** Additional data collected for all UKMYC5 plates tested. Taken from CRYPTIC Standard Operating Procedure for the Validation of a Dry-form Broth Microdilution Panel for TB DST (v1.1, 30 November 2016).

|                                                                                                                                                                |
|----------------------------------------------------------------------------------------------------------------------------------------------------------------|
| <b>Data Field</b>                                                                                                                                              |
| Isolate ID, including replicate number                                                                                                                         |
| Reader name                                                                                                                                                    |
| Subculture date onto solid media                                                                                                                               |
| Inoculation date                                                                                                                                               |
| Colony count on 7H10/7H11 at day 21                                                                                                                            |
| Lot numbers of 7H9 with OADC, saline solution with tween and glass beads, microtitre plates                                                                    |
| Reading dates                                                                                                                                                  |
| Information on the physical integrity of the plate                                                                                                             |
| MIC readings using three different methods for each drug, i.e. mirrored box, Sensititre™ Vizion™ Digital Viewing System (Vizion) and inverted-light microscope |
| PZA DST inoculation date and result                                                                                                                            |



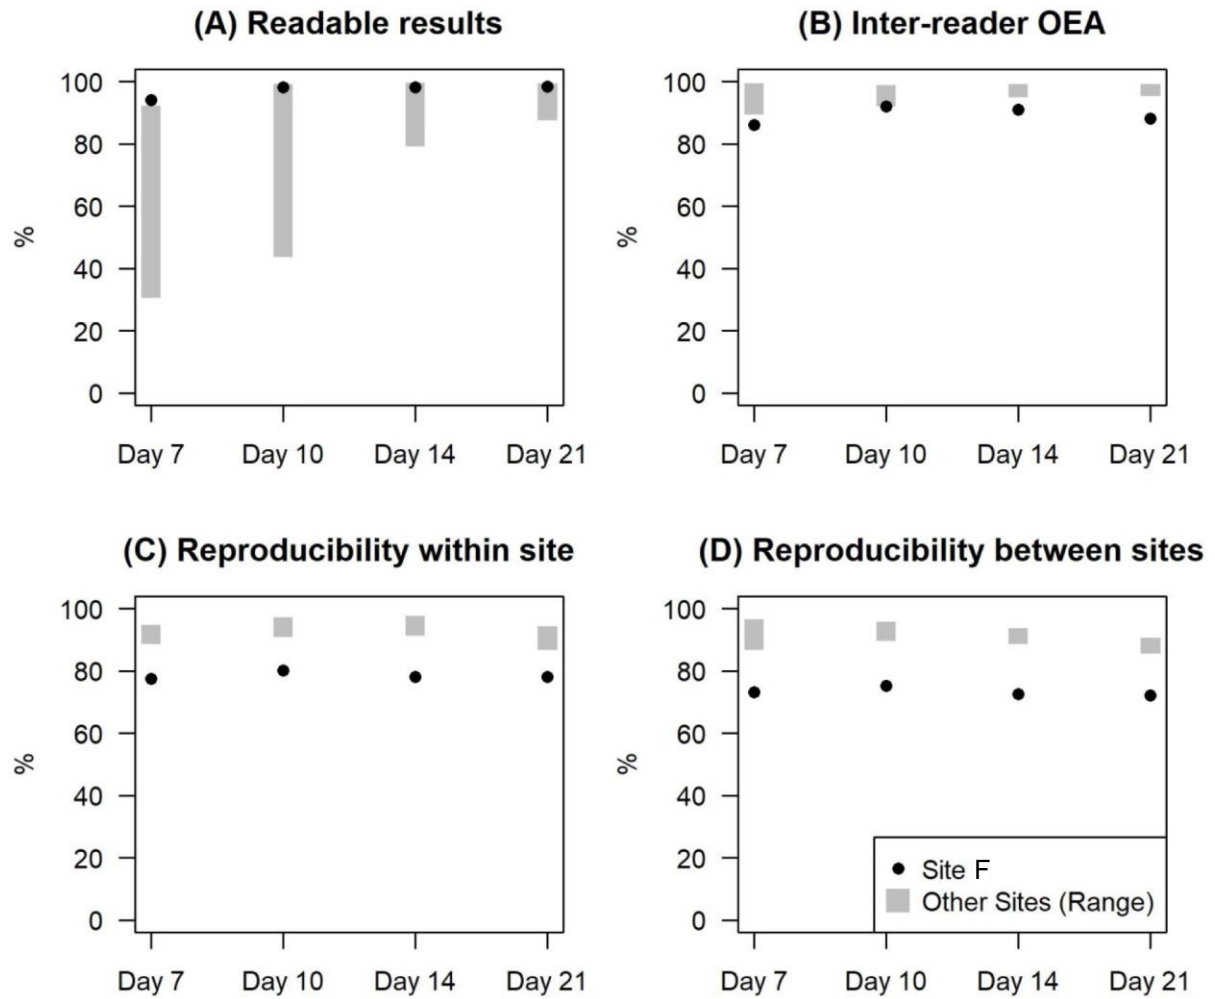

**Figure S6.** (A) The percentage of results that are considered readable increases with the incubation time. Site F showed a lower (B) inter-reader agreement and (C) intra- and (D) inter-laboratory reproducibility with respect to the other sites.

**Table S18.** Related to Figure S3. **(A)** The percentage of results that are considered readable increases with the incubation time. Site F showed **(B)** lower intra-reader agreement and lower **(C)** intra- and **(D)** inter-laboratory reproducibility with respect to the other sites.

**(A) Percentage (%) of readable results**

| <b>Reading Method</b> | <b>Day 7</b> | <b>Day 10</b> | <b>Day 14</b> | <b>Day 21</b> |
|-----------------------|--------------|---------------|---------------|---------------|
| Site F                | 94.2         | 98.2          | 98.2          | 98.4          |
| Other Sites (min-max) | (30.4-92.7)  | (43.5-99.7)   | (78.9-100.0)  | (87.4-99.9)   |

**(B) Inter-reader agreement (%)**

| <b>Reading Method</b> | <b>Day 7</b> | <b>Day 10</b> | <b>Day 14</b> | <b>Day 21</b> |
|-----------------------|--------------|---------------|---------------|---------------|
| Site F                | 86.2         | 92.0          | 91.0          | 88.3          |
| Other Sites (min-max) | (89.2-99.8)  | (91.8-99.3)   | (94.8-99.8)   | (95.2-99.7)   |

**(C) Intra-laboratory reproducibility (%)**

| <b>Reading Method</b> | <b>Day 7</b> | <b>Day 10</b> | <b>Day 14</b> | <b>Day 21</b> |
|-----------------------|--------------|---------------|---------------|---------------|
| Site F                | 77.5         | 80.2          | 78.0          | 78.2          |
| Other Sites (min-max) | (88.5-95.2)  | (90.6-97.6)   | (91.0-98.1)   | (86.6-94.7)   |

**(D) Inter-laboratory reproducibility (%)**

| <b>Reading Method</b> | <b>Day 7</b> | <b>Day 10</b> | <b>Day 14</b> | <b>Day 21</b> |
|-----------------------|--------------|---------------|---------------|---------------|
| Site F                | 73.2         | 75.3          | 72.5          | 72.2          |
| Other Sites (min-max) | (86.6-97.1)  | (89.5-96.1)   | (88.3-94.2)   | (85.2-91.1)   |

**Table S19.** Logistic mixed-effects models for inter-reader agreement, intra- and inter-laboratory reproducibility (adjusted for reading day, method, drug, interaction between reading day and method, interaction between reading day and drug). Random effects were defined nested with respect to strains and replicates.

| Parameter   | Inter-reader agreement |       |         | Intra-laboratory reproducibility |       |         | Inter-laboratory reproducibility |       |         |
|-------------|------------------------|-------|---------|----------------------------------|-------|---------|----------------------------------|-------|---------|
|             | Estimate               | SE    | p-value | Estimate                         | SE    | p-value | Estimate                         | SE    | p-value |
| Intercept   | 3.634                  | 0.246 | <0.001  | 2.115                            | 0.138 | <0.001  | 1.909                            | 0.133 | <0.001  |
| SITE ID     |                        |       |         |                                  |       |         |                                  |       |         |
| SITE A vs F | 0.422                  | 0.166 | 0.011   | 1.252                            | 0.134 | <0.001  | 1.440                            | 0.120 | <0.001  |
| SITE B vs F | 3.265                  | 0.266 | <0.001  | 1.529                            | 0.140 | <0.001  | 1.560                            | 0.124 | <0.001  |
| SITE C vs F | 2.257                  | 0.185 | <0.001  | 2.043                            | 0.135 | <0.001  | 1.846                            | 0.119 | <0.001  |
| SITE D vs F | 2.765                  | 0.273 | <0.001  | 2.081                            | 0.160 | <0.001  | 1.326                            | 0.137 | <0.001  |
| SITE E vs F | 0.355                  | 0.173 | 0.040   | 0.891                            | 0.138 | <0.001  | 1.173                            | 0.123 | <0.001  |
| SITE G vs F | 0.860                  | 0.175 | <0.001  | 1.287                            | 0.134 | <0.001  | 1.559                            | 0.120 | <0.001  |

**Table S20.** Serial drug concentrations used in the agar proportion method (APM)

| <b>Drug</b>              | <b>Testing Range (mg/L)</b> |
|--------------------------|-----------------------------|
| Amikacin                 | 0.06-16                     |
| Bedaquiline              | 0.004-4                     |
| Clofazimine              | 0.016-16                    |
| Delamanid                | 0.008-8                     |
| Ethambutol               | 0.06-32                     |
| Ethionamide              | n/a                         |
| Isoniazid                | 0.008-8                     |
| Kanamycin                | 0.5-16                      |
| Levofloxacin             | 0.03-16                     |
| Linezolid                | 0.008-8                     |
| Moxifloxacin             | 0.016-16                    |
| Para-aminosalicylic acid | na                          |
| Rifabutin                | 0.004-4                     |
| Rifampicin               | 0.016-8                     |

**Table S21.** Concentration ranges used in the resazurin microtitre assay (REMA).

| <b>Drug</b>              | <b>Testing Range (mg/L)</b> |
|--------------------------|-----------------------------|
| Amikacin                 | 0.03-16                     |
| Bedaquiline              | 0.004-2                     |
| Clofazimine              | 0.004-2                     |
| Delamanid                | 0.004-2                     |
| Ethambutol               | 0.03-16                     |
| Ethionamide              | n/a                         |
| Isoniazid                | 0.016-8                     |
| Kanamycin                | 0.06-32                     |
| Levofloxacin             | 0.016-8                     |
| Linezolid                | 0.016-8                     |
| Moxifloxacin             | 0.008-4                     |
| Para-aminosalicylic acid | n/a                         |
| Rifabutin                | 0.004-2                     |
| Rifampicin               | 0.008-4                     |

**Table S22.** See separate Excel spreadsheet.
